# Supplementary material for: Population Pharmacokinetic Analysis of Tiropramide in Healthy Korean Subjects
Source: MDPI journal article supplement (doi:10.3390/pharmaceutics12040374), 2020-04-18
Supplement: s1 [file s1]

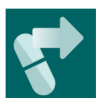

# Supplementary Materials: Population Pharmacokinetic Analysis of Tiropramide in Healthy Korean Subjects

Seung-Hyun Jeong, Ji-Hun Jang, Hea-Young Cho and Yong-Bok Lee \*

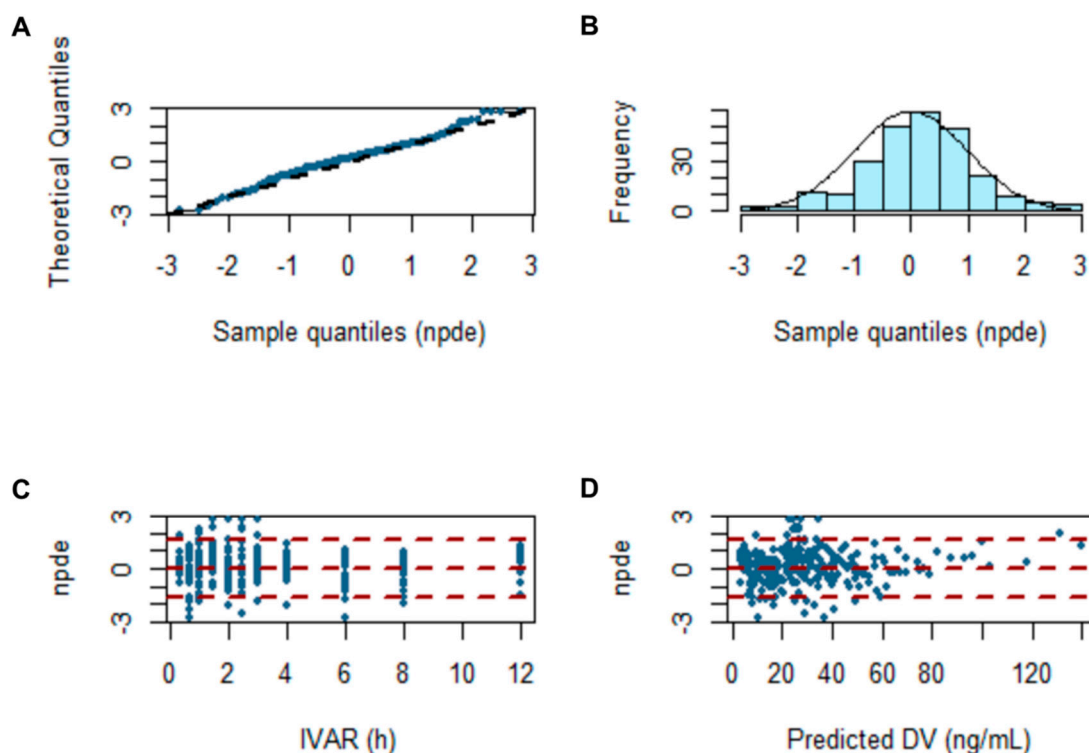

**Figure S1.** Normalized prediction distribution error (NPDE) for the final model. Quantile-quantile plots of NPDE versus the theoretical  $N(0, 1)$  distribution (A). Histogram the distribution of the NPDE, overlaid with the density of the standard Gaussian distribution (B). Scatter plot of the time versus NPDE (C). Scatterplot of predictions versus NPDE (D).
